# Supplementary material
Source: Springer Nature journal article supplement (https://www.springermedizin.de/resource/supplementary/12889_2012_5029_MOESM8_ESM.pdf/9490696)

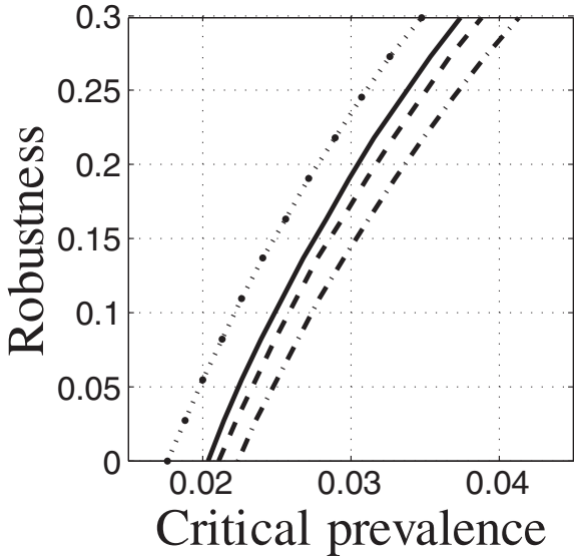

Supplement: MOESM8 [file 9490696]
